# Supplementary material for: Electrostatic potential-derived charge: a universal OER performance descriptor for MOFs
Source: Royal Society of Chemistry journal article supplement (doi:10.1039/d2sc04898a), 2022-01-01
Supplement: d2sc04898a2.pdf [file d2sc04898a2.pdf]

## Supporting Information

### Electrostatic potential-derived charge: a universal OER performance descriptor for MOFs

Xiangdong Xue<sup>a</sup>, Hongyi Gao<sup>a,\*</sup>, Jiangtao Liu<sup>c</sup>, Ming Yang<sup>d</sup>, Shihao Feng<sup>a</sup>, Zhimeng Liu<sup>a</sup>, Jing Lin<sup>a</sup>,

Jitti Kasemchainan<sup>e</sup>, Linmeng Wang<sup>a</sup>, Qilu Jia<sup>a</sup>, Ge Wang<sup>a,b,\*</sup>

<sup>a</sup> *Beijing Advanced Innovation Center for Materials Genome Engineering, Beijing Key Laboratory of  
Function Materials for Molecule & Structure Construction, School of Materials Science and Engineering,  
University of Science and Technology Beijing, Beijing, 100083, PR China*

<sup>b</sup> *Shunde Graduate School, University of Science and Technology Beijing, Shunde, 528399, PR China*

<sup>c</sup> *State Key Laboratory of Advanced Chemical Power Sources. Guizhou Meiling Power Sources Co., Ltd.,  
Zunyi, Guizhou 563003, PR China*

<sup>d</sup> *Department of Applied Physics, The Hong Kong Polytechnic University, Hung Hom, Hong Kong SAR,  
China*

<sup>e</sup> *Department of Chemical Technology, Chulalongkorn University, Bangkok 10330, Thailand*

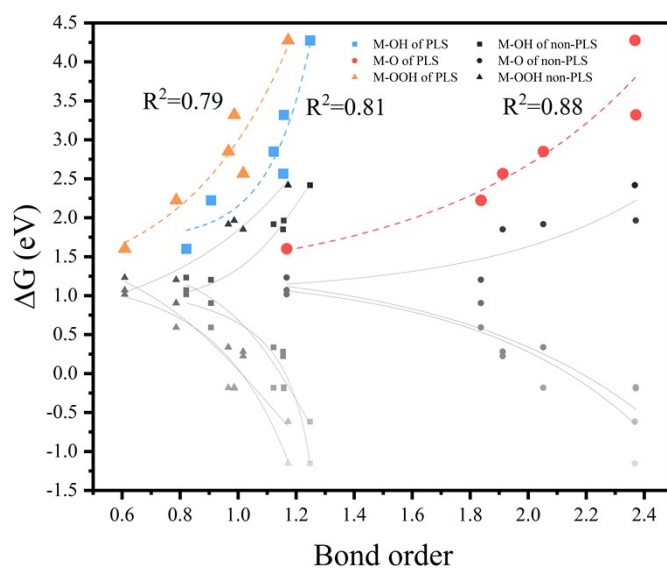

**Figure S1.** Correlation between the Gibbs energy difference and bond order. All data are fitted to exponential functions.

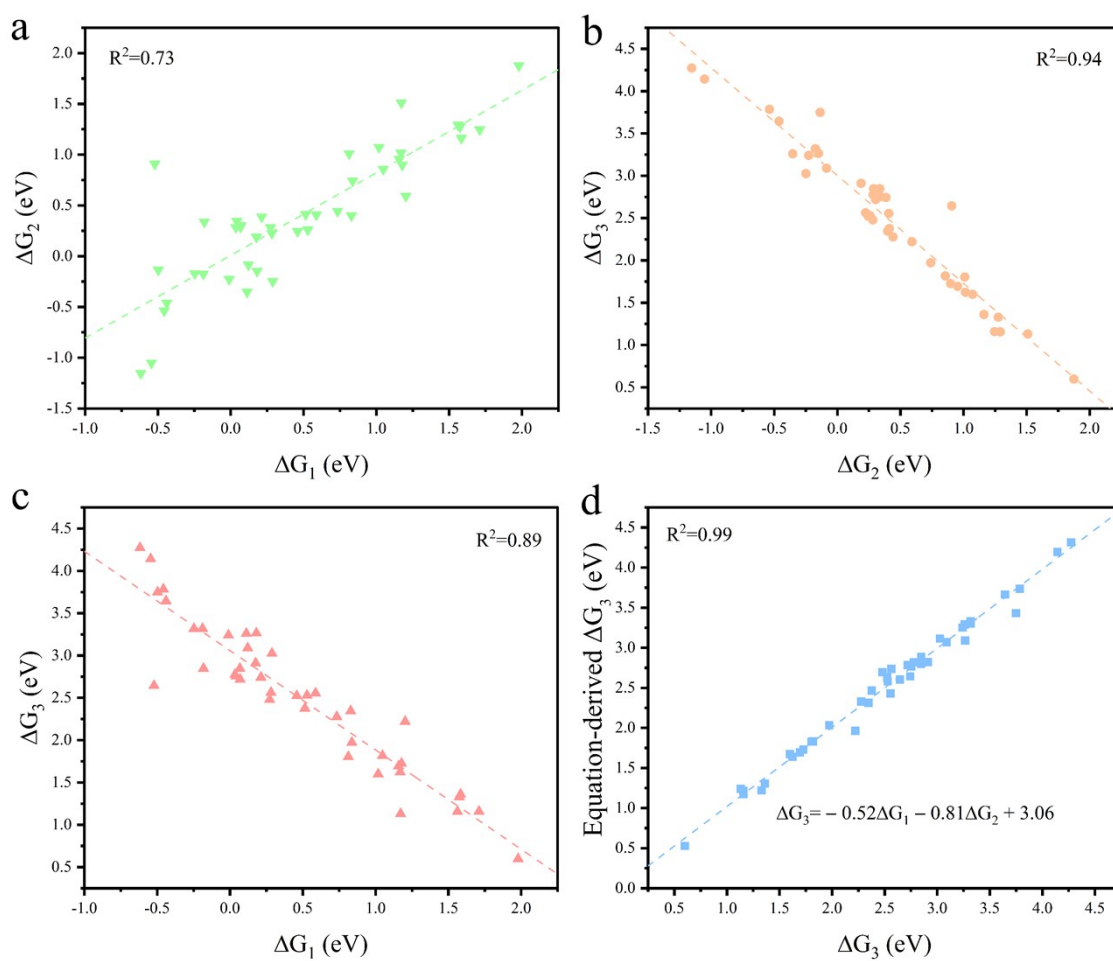

**Figure S2.** The relationship between the  $\Delta G_1$ ,  $\Delta G_2$  and  $\Delta G_3$  in the OER process. Dash lines were fitted for all data represented.

A critical indicator for evaluating the activity of an electrocatalyst is the reaction potential, which can be represented by the Gibbs energy difference ( $\Delta G$ ) reflecting the energy barrier of a chemical reaction. For four-electron OER process, the  $\Delta G_i$  ( $i=1, 2, 3, 4$ ) reflect the energy barrier of each elemental step. Nevertheless, it is complicating to use  $\Delta G_i$  ( $i=1, 2, 3, 4$ ) to evaluate the OER performance of the catalyst. It is worthy to clarify the relationship between the  $\Delta G_i$  ( $i=1, 2, 3, 4$ ) to simplify the complexity of performance ranking. Firstly, we analyzed the scaling relationship between  $\Delta G_1$ ,  $\Delta G_2$  and  $\Delta G_3$ .  $\Delta G_4$  is not considered because it is not an independent quantity under the condition that the total Gibbs energy difference ( $\Delta G_{\text{total}}$ ) of OER is 4.92 eV<sup>[1]</sup>. The obvious linear relationships between  $\Delta G_1$ ,  $\Delta G_2$  and  $\Delta G_3$  were shown in Figure S2a-c, where  $\Delta G_1$  and  $\Delta G_2$  are positively correlated, and they are all negatively correlated with  $\Delta G_3$ . Moreover, although  $\Delta G_3$  can be approximately replaced by a constant subtract  $\Delta G_2$  ( $R^2 = 0.94$ ) as reported in other literature<sup>[2]</sup>, by multiple linear regression analysis,  $\Delta G_3$  can almost be represented by a formula containing  $\Delta G_1$  and  $\Delta G_2$  ( $R^2 = 0.99$ , Figure S2d). And because of the non-independence of  $\Delta G_4$ , the  $\Delta G_i$  ( $i=1, 2, 3, 4$ ) can be quantified by  $\Delta G_1$  and  $\Delta G_2$ .

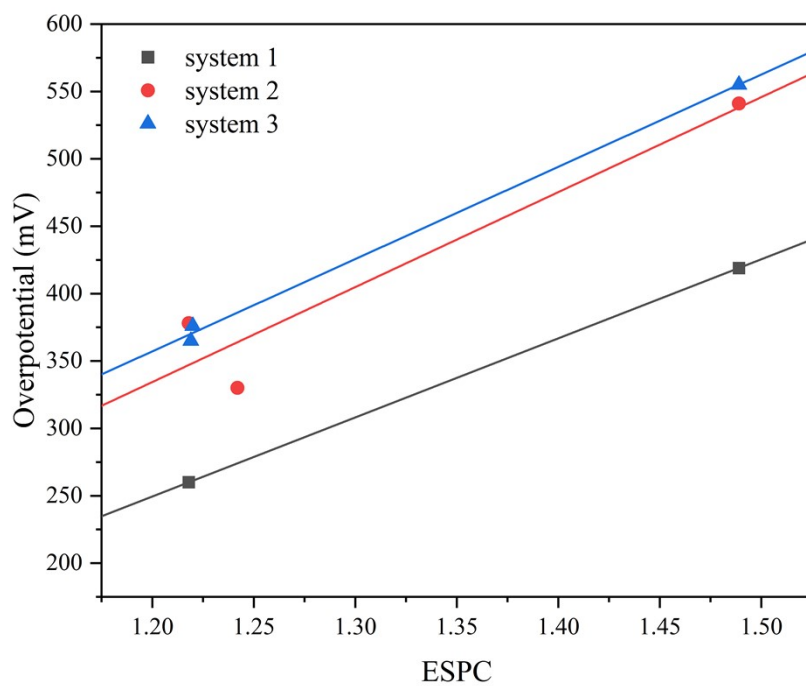

**Figure S3** The correlations between experiment-derived overpotential and ESPC, system 1 comes from ref.

3, system 2 comes from ref. 4, and system 3 comes from ref. 5.

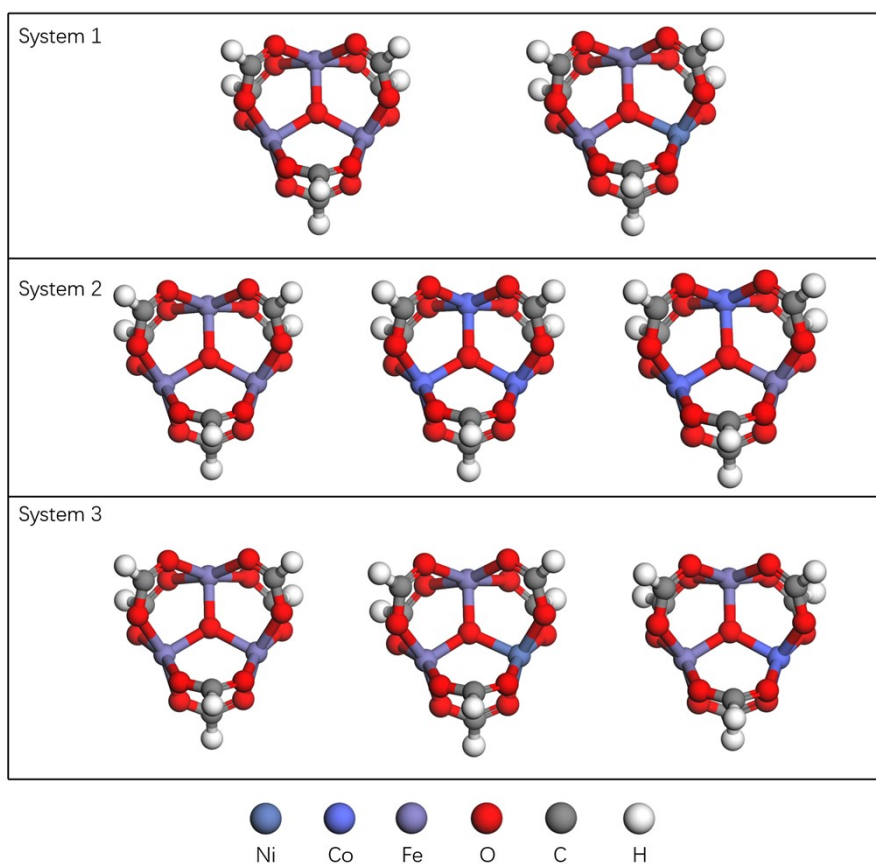

**Figure S4** The structure using for calculation in figure S3.

**Table S1.** The original calculated OER data of MOFs containing triangular prismatic SBUs

| Configuration | $E_{\text{DFT}}$ (eV) | $E_{\text{ZPE}}$ (eV) | TS (eV) | $\Delta G$ (eV) |       |
|---------------|-----------------------|-----------------------|---------|-----------------|-------|
| V             | Cat.                  | -39939.90             |         |                 |       |
|               | HO-Cat.               | -42002.46             | 0.34    | 0.10            | -0.62 |
|               | O-Cat.                | -41987.45             | 0.08    | 0.06            | -1.15 |
|               | HOO-Cat.              | -44045.12             | 0.44    | 0.19            | 4.27  |
|               | O <sub>2</sub> +Cat.  |                       |         |                 | 2.42  |
| Cr            | Cat.                  | -41334.73             |         |                 |       |
|               | HO-Cat.               | -43396.86             | 0.34    | 0.11            | -0.19 |
|               | O-Cat.                | -43380.89             | 0.08    | 0.05            | -0.17 |
|               | HOO-Cat.              | -45439.48             | 0.43    | 0.20            | 3.32  |
|               | O <sub>2</sub> +Cat.  |                       |         |                 | 1.96  |
| Mn            | Cat.                  | -42846.95             |         |                 |       |
|               | HO-Cat.               | -44909.08             | 0.34    | 0.10            | -0.18 |
|               | O-Cat.                | -44892.59             | 0.08    | 0.05            | 0.34  |
|               | HOO-Cat.              | -46951.68             | 0.45    | 0.18            | 2.85  |
|               | O <sub>2</sub> +Cat.  |                       |         |                 | 1.92  |
| Fe            | Cat.                  | -44592.81             |         |                 |       |
|               | HO-Cat.               | -46654.50             | 0.36    | 0.09            | 0.28  |
|               | O-Cat.                | -46638.09             | 0.07    | 0.05            | 0.22  |
|               | HOO-Cat.              | -48697.44             | 0.44    | 0.21            | 2.56  |
|               | O <sub>2</sub> +Cat.  |                       |         |                 | 1.85  |
| Co            | Cat.                  | -46518.61             |         |                 |       |
|               | HO-Cat.               | -48579.38             | 0.36    | 0.08            | 1.20  |
|               | O-Cat.                | -48562.59             | 0.07    | 0.05            | 0.59  |
|               | HOO-Cat.              | -50622.35             | 0.45    | 0.16            | 2.22  |
|               | O <sub>2</sub> +Cat.  |                       |         |                 | 0.91  |
| Ni            | Cat.                  | -48692.90             |         |                 |       |
|               | HO-Cat.               | -50753.83             | 0.35    | 0.11            | 1.02  |
|               | O-Cat.                | -50736.58             | 0.06    | 0.06            | 1.07  |
|               | HOO-Cat.              | -52796.95             | 0.44    | 0.17            | 1.60  |
|               | O <sub>2</sub> +Cat.  |                       |         |                 | 1.23  |
| V2Cu1_Cu      | Cat.                  | -43646.29             |         |                 |       |
|               | HO-Cat.               | -45706.65             | 0.34    | 0.11            | 1.58  |
|               | O-Cat.                | -45689.16             | 0.04    | 0.09            | 1.28  |
|               | HOO-Cat.              | -47749.80             | 0.44    | 0.21            | 1.33  |
|               | O <sub>2</sub> +Cat.  |                       |         |                 | 0.74  |
| V2Mn1_Mn      | Cat.                  | -40909.19             |         |                 |       |
|               | HO-Cat.               | -42971.11             | 0.35    | 0.10            | 0.04  |
|               | O-Cat.                | -42954.59             | 0.07    | 0.05            | 0.34  |
|               | HOO-Cat.              | -45013.78             | 0.45    | 0.18            | 2.75  |
|               | O <sub>2</sub> +Cat.  |                       |         |                 | 1.78  |

**Table S1.** (continued)

| Configuration | $E_{\text{DFT}}$ (eV) | $E_{\text{ZPE}}$ (eV) | TS (eV) | $\Delta G$ (eV) |
|---------------|-----------------------|-----------------------|---------|-----------------|
| V2Cr1_Cr      | Cat.                  | -40404.87             |         |                 |
|               | HO-Cat.               | -42467.06             | 0.35    | 0.10            |
|               | O-Cat.                | -42451.07             | 0.08    | 0.06            |
|               | HOO-Cat.              | -44509.68             | 0.44    | 0.19            |
|               | O <sub>2</sub> +Cat.  |                       |         |                 |
|               |                       |                       |         | 2.02            |
| V2Fe1_Fe      | Cat.                  | -41491.10             |         |                 |
|               | HO-Cat.               | -43552.97             | 0.34    | 0.10            |
|               | O-Cat.                | -43536.54             | 0.08    | 0.05            |
|               | HOO-Cat.              | -45595.63             | 0.44    | 0.17            |
|               | O <sub>2</sub> +Cat.  |                       |         |                 |
|               |                       |                       |         | 1.72            |
| V2Co1_Co      | Cat.                  | -42132.72             |         |                 |
|               | HO-Cat.               | -44194.25             | 0.37    | 0.08            |
|               | O-Cat.                | -44177.79             | 0.07    | 0.06            |
|               | HOO-Cat.              | -46237.26             | 0.46    | 0.15            |
|               | O <sub>2</sub> +Cat.  |                       |         |                 |
|               |                       |                       |         | 1.69            |
| V2Ni1_Ni      | Cat.                  | -42858.41             |         |                 |
|               | HO-Cat.               | -44919.19             | 0.35    | 0.09            |
|               | O-Cat.                | -44902.08             | 0.05    | 0.07            |
|               | HOO-Cat.              | -46962.34             | 0.45    | 0.18            |
|               | O <sub>2</sub> +Cat.  |                       |         |                 |
|               |                       |                       |         | 1.12            |
| Cr2V1_V       | Cat.                  | -40869.85             |         |                 |
|               | HO-Cat.               | -42932.36             | 0.35    | 0.09            |
|               | O-Cat.                | -42917.23             | 0.08    | 0.06            |
|               | HOO-Cat.              | -44975.02             | 0.44    | 0.19            |
|               | O <sub>2</sub> +Cat.  |                       |         |                 |
|               |                       |                       |         | 2.37            |
| Cr2Mn1_Mn     | Cat.                  | -41839.05             |         |                 |
|               | HO-Cat.               | -43900.93             | 0.35    | 0.10            |
|               | O-Cat.                | -43884.46             | 0.07    | 0.05            |
|               | HOO-Cat.              | -45943.68             | 0.44    | 0.18            |
|               | O <sub>2</sub> +Cat.  |                       |         |                 |
|               |                       |                       |         | 1.83            |
| Cr2Fe1_Fe     | Cat.                  | -42420.98             |         |                 |
|               | HO-Cat.               | -44482.75             | 0.34    | 0.10            |
|               | O-Cat.                | -44466.40             | 0.07    | 0.05            |
|               | HOO-Cat.              | -46525.46             | 0.45    | 0.16            |
|               | O <sub>2</sub> +Cat.  |                       |         |                 |
|               |                       |                       |         | 1.64            |
| Cr2Co1_Co     | Cat.                  | -43062.57             |         |                 |
|               | HO-Cat.               | -45124.03             | 0.36    | 0.08            |
|               | O-Cat.                | -45107.56             | 0.07    | 0.05            |
|               | HOO-Cat.              | -47167.04             | 0.46    | 0.14            |
|               | O <sub>2</sub> +Cat.  |                       |         |                 |
|               |                       |                       |         | 1.60            |

**Table S1.** (continued)

| Configuration |                      | $E_{\text{DFT}}$ (eV) | $E_{\text{ZPE}}$ (eV) | TS (eV) | $\Delta G$ (eV) |
|---------------|----------------------|-----------------------|-----------------------|---------|-----------------|
| Cr2Ni1_Ni     | Cat.                 | -43788.01             |                       |         |                 |
|               | HO-Cat.              | -45848.93             | 0.36                  | 0.09    | 1.05            |
|               | O-Cat.               | -45831.85             | 0.05                  | 0.07    | 0.86            |
|               | HOO-Cat.             | -47892.03             | 0.45                  | 0.17    | 1.82            |
|               | O <sub>2</sub> +Cat. |                       |                       |         | 1.20            |
| Cr2Cu1_Cu     | Cat.                 | -44575.97             |                       |         |                 |
|               | HO-Cat.              | -46636.34             | 0.35                  | 0.10    | 1.58            |
|               | O-Cat.               | -46618.95             | 0.05                  | 0.08    | 1.16            |
|               | HOO-Cat.             | -48679.56             | 0.43                  | 0.20    | 1.36            |
|               | O <sub>2</sub> +Cat. |                       |                       |         | 0.81            |
| Mn2V1_V       | Cat.                 | -41878.45             |                       |         |                 |
|               | HO-Cat.              | -43940.84             | 0.35                  | 0.09    | -0.44           |
|               | O-Cat.               | -43925.13             | 0.08                  | 0.06    | -0.46           |
|               | HOO-Cat.             | -45983.48             | 0.47                  | 0.16    | 3.64            |
|               | O <sub>2</sub> +Cat. |                       |                       |         | 2.18            |
| Mn2Cr1_Cr     | Cat.                 | -42343.07             |                       |         |                 |
|               | HO-Cat.              | -44405.04             | 0.35                  | 0.10    | -0.01           |
|               | O-Cat.               | -44389.10             | 0.08                  | 0.05    | -0.23           |
|               | HOO-Cat.             | -46447.83             | 0.46                  | 0.17    | 3.24            |
|               | O <sub>2</sub> +Cat. |                       |                       |         | 1.92            |
| Fe2V1_V       | Cat.                 | -43042.27             |                       |         |                 |
|               | HO-Cat.              | -45104.68             | 0.35                  | 0.09    | -0.46           |
|               | O-Cat.               | -45089.05             | 0.08                  | 0.06    | -0.54           |
|               | HOO-Cat.             | -47147.20             | 0.45                  | 0.20    | 3.78            |
|               | O <sub>2</sub> +Cat. |                       |                       |         | 2.13            |
| Mn2Fe1_Fe     | Cat.                 | -43428.90             |                       |         |                 |
|               | HO-Cat.              | -45490.81             | 0.35                  | 0.10    | 0.03            |
|               | O-Cat.               | -45474.37             | 0.07                  | 0.05    | 0.28            |
|               | HOO-Cat.             | -47533.55             | 0.45                  | 0.16    | 2.78            |
|               | O <sub>2</sub> +Cat. |                       |                       |         | 1.83            |
| Mn2Co1_Co     | Cat.                 | -44070.43             |                       |         |                 |
|               | HO-Cat.              | -46132.15             | 0.37                  | 0.08    | 0.27            |
|               | O-Cat.               | -46115.66             | 0.07                  | 0.05    | 0.28            |
|               | HOO-Cat.             | -48175.16             | 0.46                  | 0.16    | 2.48            |
|               | O <sub>2</sub> +Cat. |                       |                       |         | 1.89            |
| Mn2Ni1_Ni     | Cat.                 | -44795.82             |                       |         |                 |
|               | HO-Cat.              | -46856.96             | 0.35                  | 0.10    | 0.81            |
|               | O-Cat.               | -46839.74             | 0.05                  | 0.07    | 1.01            |
|               | HOO-Cat.             | -48899.93             | 0.45                  | 0.17    | 1.80            |
|               | O <sub>2</sub> +Cat. |                       |                       |         | 1.29            |

**Table S1.** (continued)

| Configuration | $E_{\text{DFT}}$ (eV) | $E_{\text{ZPE}}$ (eV) | TS (eV) | $\Delta G$ (eV) |       |
|---------------|-----------------------|-----------------------|---------|-----------------|-------|
| Mn2Cu1_Cu     | Cat.                  | -45583.74             |         |                 |       |
|               | HO-Cat.               | -47644.51             | 0.34    | 0.10            | 1.17  |
|               | O-Cat.                | -47626.79             | 0.05    | 0.08            | 1.51  |
|               | HOO-Cat.              | -49687.65             | 0.44    | 0.18            | 1.13  |
|               | O <sub>2</sub> +Cat.  |                       |         |                 | 1.11  |
| Fe2Cr1_Cr     | Cat.                  | -43506.97             |         |                 |       |
|               | HO-Cat.               | -45568.83             | 0.35    | 0.09            | 0.11  |
|               | O-Cat.                | -45553.00             | 0.08    | 0.05            | -0.35 |
|               | HOO-Cat.              | -47611.72             | 0.46    | 0.16            | 3.26  |
|               | O <sub>2</sub> +Cat.  |                       |         |                 | 1.90  |
| Fe2Mn1_Mn     | Cat.                  | -44010.94             |         |                 |       |
|               | HO-Cat.               | -46073.42             | 0.35    | 0.09            | -0.52 |
|               | O-Cat.                | -46056.33             | 0.07    | 0.05            | 0.91  |
|               | HOO-Cat.              | -48115.67             | 0.46    | 0.16            | 2.64  |
|               | O <sub>2</sub> +Cat.  |                       |         |                 | 1.89  |
| Fe2Co1_Co     | Cat.                  | -45234.73             |         |                 |       |
|               | HO-Cat.               | -47295.89             | 0.37    | 0.08            | 0.83  |
|               | O-Cat.                | -47279.28             | 0.07    | 0.05            | 0.40  |
|               | HOO-Cat.              | -49338.87             | 0.45    | 0.20            | 2.35  |
|               | O <sub>2</sub> +Cat.  |                       |         |                 | 1.35  |
| Fe2Ni1_Ni     | Cat.                  | -45959.92             |         |                 |       |
|               | HO-Cat.               | -48020.73             | 0.35    | 0.09            | 1.16  |
|               | O-Cat.                | -48003.55             | 0.05    | 0.07            | 0.95  |
|               | HOO-Cat.              | -50063.85             | 0.45    | 0.17            | 1.69  |
|               | O <sub>2</sub> +Cat.  |                       |         |                 | 1.11  |
| Fe2Cu1_Cu     | Cat.                  | -46748.05             |         |                 |       |
|               | HO-Cat.               | -48807.99             | 0.33    | 0.11            | 1.98  |
|               | O-Cat.                | -48789.91             | 0.04    | 0.08            | 1.88  |
|               | HOO-Cat.              | -50851.29             | 0.43    | 0.21            | 0.60  |
|               | O <sub>2</sub> +Cat.  |                       |         |                 | 0.47  |
| Co2V1_V       | Cat.                  | -44325.84             |         |                 |       |
|               | HO-Cat.               | -46388.29             | 0.35    | 0.09            | -0.50 |
|               | O-Cat.                | -46372.25             | 0.08    | 0.06            | -0.14 |
|               | HOO-Cat.              | -48430.49             | 0.46    | 0.16            | 3.75  |
|               | O <sub>2</sub> +Cat.  |                       |         |                 | 1.80  |
| Co2Cr1_Cr     | Cat.                  | -44790.37             |         |                 |       |
|               | HO-Cat.               | -46852.21             | 0.35    | 0.09            | 0.12  |
|               | O-Cat.                | -46836.12             | 0.08    | 0.05            | -0.08 |
|               | HOO-Cat.              | -48894.99             | 0.46    | 0.18            | 3.09  |
|               | O <sub>2</sub> +Cat.  |                       |         |                 | 1.79  |



**Table S1.** (continued)

| Configuration | $E_{\text{DFT}}$ (eV) | $E_{\text{ZPE}}$ (eV) | TS (eV) | $\Delta G$ (eV) |
|---------------|-----------------------|-----------------------|---------|-----------------|
| Co2Mn1_Mn     | Cat.                  | -45294.42             |         |                 |
|               | HO-Cat.               | -47356.17             | 0.35    | 0.09            |
|               | O-Cat.                | -47339.60             | 0.07    | 0.05            |
|               | HOO-Cat.              | -49398.83             | 0.45    | 0.17            |
|               | O <sub>2</sub> +Cat.  |                       |         | 1.58            |
| Co2Fe1_Fe     | Cat.                  | -45876.54             |         |                 |
|               | HO-Cat.               | -47937.97             | 0.34    | 0.10            |
|               | O-Cat.                | -47921.39             | 0.07    | 0.05            |
|               | HOO-Cat.              | -49981.01             | 0.46    | 0.15            |
|               | O <sub>2</sub> +Cat.  |                       |         | 1.62            |
| Co2Ni1_Ni     | Cat.                  | -47243.29             |         |                 |
|               | HO-Cat.               | -49304.11             | 0.36    | 0.08            |
|               | O-Cat.                | -49286.86             | 0.06    | 0.06            |
|               | HOO-Cat.              | -51347.23             | 0.45    | 0.17            |
|               | O <sub>2</sub> +Cat.  |                       |         | 1.11            |
| Co2Cu1_Cu     | Cat.                  | -48030.98             |         |                 |
|               | HO-Cat.               | -50091.21             | 0.34    | 0.10            |
|               | O-Cat.                | -50073.71             | 0.05    | 0.12            |
|               | HOO-Cat.              | -52134.56             | 0.44    | 0.20            |
|               | O <sub>2</sub> +Cat.  |                       |         | 0.81            |
| Ni2V1_V       | Cat.                  | -45776.39             |         |                 |
|               | HO-Cat.               | -47838.17             | 0.35    | 0.09            |
|               | O-Cat.                | -47822.14             | 0.08    | 0.06            |
|               | HOO-Cat.              | -49880.86             | 0.46    | 0.16            |
|               | O <sub>2</sub> +Cat.  |                       |         | 1.62            |
| Ni2Cr1_Cr     | Cat.                  | -46240.55             |         |                 |
|               | HO-Cat.               | -48302.23             | 0.35    | 0.09            |
|               | O-Cat.                | -48286.29             | 0.08    | 0.05            |
|               | HOO-Cat.              | -50345.25             | 0.46    | 0.16            |
|               | O <sub>2</sub> +Cat.  |                       |         | 1.86            |
| Ni2Mn1_Mn     | Cat.                  | -46744.90             |         |                 |
|               | HO-Cat.               | -48806.29             | 0.36    | 0.08            |
|               | O-Cat.                | -48789.70             | 0.08    | 0.05            |
|               | HOO-Cat.              | -50849.12             | 0.46    | 0.15            |
|               | O <sub>2</sub> +Cat.  |                       |         | 1.37            |
| Ni2Fe1_Fe     | Cat.                  | -47326.67             |         |                 |
|               | HO-Cat.               | -49387.90             | 0.36    | 0.09            |
|               | O-Cat.                | -49371.28             | 0.07    | 0.05            |
|               | HOO-Cat.              | -51430.98             | 0.46    | 0.15            |
|               | O <sub>2</sub> +Cat.  |                       |         | 1.47            |

**Table S1.** (continued)

| Configuration |                      | $E_{\text{DFT}}$ (eV) | $E_{\text{ZPE}}$ (eV) | TS (eV) | $\Delta G$ (eV) |
|---------------|----------------------|-----------------------|-----------------------|---------|-----------------|
| Ni2Co1_Co     | Cat.                 | -47968.15             |                       |         |                 |
|               | HO-Cat.              | -50029.30             | 0.36                  | 0.08    | 0.84            |
|               | O-Cat.               | -50012.36             | 0.07                  | 0.05    | 0.74            |
|               | HOO-Cat.             | -52072.36             | 0.45                  | 0.16    | 1.97            |
|               | O <sub>2</sub> +Cat. |                       |                       |         | 1.37            |
| Ni2Cu1_Cu     | Cat.                 | -49480.49             |                       |         |                 |
|               | HO-Cat.              | -51540.84             | 0.33                  | 0.12    | 1.56            |
|               | O-Cat.               | -51523.37             | 0.04                  | 0.08    | 1.29            |
|               | HOO-Cat.             | -53584.20             | 0.44                  | 0.19    | 1.16            |
|               | O <sub>2</sub> +Cat. |                       |                       |         | 0.91            |

**Table S2.** The original calculated OER data of MOFs containing typical SBUs.

| Configuration    |                      | $E_{\text{DFT}}$ (eV) | $E_{\text{ZPE}}$ (eV) | TS (eV) | $\Delta G$ (eV) |
|------------------|----------------------|-----------------------|-----------------------|---------|-----------------|
| 4-coordinated_Mn | Cat.                 | -28157.21             |                       |         |                 |
|                  | HO-Cat.              | -30218.33             | 0.35                  | 0.09    | 0.84            |
|                  | O-Cat.               | -30202.28             | 0.08                  | 0.05    | -0.10           |
|                  | HOO-Cat.             | -32261.25             | 0.45                  | 0.16    | 2.98            |
|                  | O <sub>2</sub> +Cat. |                       |                       |         | 1.21            |
| 4-coordinated_Fe | Cat.                 | -28739.07             |                       |         |                 |
|                  | HO-Cat.              | -30799.97             | 0.34                  | 0.11    | 1.03            |
|                  | O-Cat.               | -30783.55             | 0.07                  | 0.05    | 0.27            |
|                  | HOO-Cat.             | -32843.00             | 0.44                  | 0.18    | 2.49            |
|                  | O <sub>2</sub> +Cat. |                       |                       |         | 1.13            |
| 4-coordinated_Co | Cat.                 | -29380.20             |                       |         |                 |
|                  | HO-Cat.              | -31440.91             | 0.37                  | 0.07    | 1.30            |
|                  | O-Cat.               | -31424.27             | 0.07                  | 0.06    | 0.42            |
|                  | HOO-Cat.             | -33484.41             | 0.41                  | 0.14    | 1.82            |
|                  | O <sub>2</sub> +Cat. |                       |                       |         | 1.39            |
| 4-coordinated_Ni | Cat.                 | -30105.31             |                       |         |                 |
|                  | HO-Cat.              | -32165.63             | 0.35                  | 0.11    | 1.62            |
|                  | O-Cat.               | -32148.39             | 0.05                  | 0.08    | 1.03            |
|                  | HOO-Cat.             | -34209.17             | 0.39                  | 0.17    | 1.16            |
|                  | O <sub>2</sub> +Cat. |                       |                       |         | 1.10            |
| 3-coordinated_V  | Cat.                 | -35835.77             |                       |         |                 |
|                  | HO-Cat.              | -37899.44             | 0.34                  | 0.11    | -1.73           |
|                  | O-Cat.               | -37884.79             | 0.07                  | 0.07    | -1.52           |
|                  | HOO-Cat.             | -39942.28             | 0.42                  | 0.21    | 4.42            |
|                  | O <sub>2</sub> +Cat. |                       |                       |         | 3.75            |
| 3-coordinated_Mn | Cat.                 | -37776.93             |                       |         |                 |
|                  | HO-Cat.              | -39838.96             | 0.34                  | 0.10    | -0.09           |
|                  | O-Cat.               | -39822.68             | 0.07                  | 0.08    | 0.08            |
|                  | HOO-Cat.             | -41881.82             | 0.46                  | 0.17    | 2.87            |
|                  | O <sub>2</sub> +Cat. |                       |                       |         | 2.05            |
| 3-coordinated_Fe | Cat.                 | -38941.23             |                       |         |                 |
|                  | HO-Cat.              | -41003.45             | 0.32                  | 0.16    | -0.36           |
|                  | O-Cat.               | -40986.72             | 0.06                  | 0.09    | 0.59            |
|                  | HOO-Cat.             | -43046.05             | 0.43                  | 0.22    | 2.62            |
|                  | O <sub>2</sub> +Cat. |                       |                       |         | 2.06            |
| 3-coordinated_Co | Cat.                 | -40224.30             |                       |         |                 |
|                  | HO-Cat.              | -42286.02             | 0.33                  | 0.13    | 0.18            |
|                  | O-Cat.               | -42269.24             | 0.05                  | 0.09    | 0.60            |
|                  | HOO-Cat.             | -44328.81             | 0.44                  | 0.21    | 2.40            |
|                  | O <sub>2</sub> +Cat. |                       |                       |         | 1.74            |

**Table S2.** (continued)

| Configuration    | $E_{\text{DFT}}$ (eV) | $E_{\text{ZPE}}$ (eV) | TS (eV) | $\Delta G$ (eV) |       |
|------------------|-----------------------|-----------------------|---------|-----------------|-------|
| 3-coordinated_Ni | Cat.                  | -41674.52             |         |                 |       |
|                  | HO-Cat.               | -43735.91             | 0.35    | 0.12            | 0.54  |
|                  | O-Cat.                | -43719.02             | 0.05    | 0.10            | 0.68  |
|                  | HOO-Cat.              | -45778.74             | 0.43    | 0.24            | 2.22  |
|                  | O <sub>2</sub> +Cat.  |                       |         |                 | 1.49  |
| 5-coordinated_V  | Cat.                  | -31579.68             |         |                 |       |
|                  | HO-Cat.               | -33641.89             | 0.35    | 0.09            | -0.26 |
|                  | O-Cat.                | -33626.86             | 0.08    | 0.05            | -1.13 |
|                  | HOO-Cat.              | -35684.57             | 0.46    | 0.17            | 4.24  |
|                  | O <sub>2</sub> +Cat.  |                       |         |                 | 2.07  |
| 5-coordinated_Cr | Cat.                  | -32509.52             |         |                 |       |
|                  | HO-Cat.               | -34571.02             | 0.34    | 0.10            | 0.45  |
|                  | O-Cat.                | -34555.25             | 0.08    | 0.05            | -0.38 |
|                  | HOO-Cat.              | -36614.08             | 0.45    | 0.16            | 3.13  |
|                  | O <sub>2</sub> +Cat.  |                       |         |                 | 1.72  |
| 5-coordinated_Mn | Cat.                  | -33517.86             |         |                 |       |
|                  | HO-Cat.               | -35579.39             | 0.36    | 0.08            | 0.45  |
|                  | O-Cat.                | -35562.73             | 0.08    | 0.05            | 0.47  |
|                  | HOO-Cat.              | -37622.22             | 0.45    | 0.16            | 2.47  |
|                  | O <sub>2</sub> +Cat.  |                       |         |                 | 1.53  |
| 5-coordinated_Fe | Cat.                  | -34681.79             |         |                 |       |
|                  | HO-Cat.               | -36742.97             | 0.36    | 0.08            | 0.81  |
|                  | O-Cat.                | -36726.34             | 0.07    | 0.05            | 0.43  |
|                  | HOO-Cat.              | -38785.95             | 0.46    | 0.15            | 2.38  |
|                  | O <sub>2</sub> +Cat.  |                       |         |                 | 1.30  |
| 5-coordinated_Co | Cat.                  | -35964.90             |         |                 |       |
|                  | HO-Cat.               | -38025.82             | 0.36    | 0.08            | 1.06  |
|                  | O-Cat.                | -38008.77             | 0.07    | 0.05            | 0.85  |
|                  | HOO-Cat.              | -40069.10             | 0.45    | 0.15            | 1.65  |
|                  | O <sub>2</sub> +Cat.  |                       |         |                 | 1.35  |
| 5-coordinated_Ni | Cat.                  | -37414.79             |         |                 |       |
|                  | HO-Cat.               | -39475.45             | 0.36    | 0.08            | 1.31  |
|                  | O-Cat.                | -39458.07             | 0.05    | 0.06            | 1.16  |
|                  | HOO-Cat.              | -41518.81             | 0.44    | 0.15            | 1.26  |
|                  | O <sub>2</sub> +Cat.  |                       |         |                 | 1.18  |

**Table S3.** The active-site ESPCs of SBUs with different metal combinations.

|    | V     | Cr    | Mn    | Fe    | Co    | Ni    | Cu    |
|----|-------|-------|-------|-------|-------|-------|-------|
| V  | 1.766 | 1.454 | 1.402 | 1.388 | 1.309 | 1.216 | 1.078 |
| Cr | 1.77  | 1.456 | 1.382 | 1.373 | 1.328 | 1.225 | 1.023 |
| Mn | 1.868 | 1.642 | 1.452 | 1.482 | 1.341 | 1.249 | 1.12  |
| Fe | 1.851 | 1.626 | 1.402 | 1.489 | 1.22  | 1.219 | 1.114 |
| Co | 1.88  | 1.572 | 1.411 | 1.411 | 1.218 | 1.193 | 1.082 |
| Ni | 1.889 | 1.673 | 1.557 | 1.463 | 1.336 | 1.196 | 1.163 |

## REFERENCES

- [1] Y. Zhou, G. Gao, W. Chu, L.-W. Wang, Transition-metal single atoms embedded into defective BC 3 as efficient electrocatalysts for oxygen evolution and reduction reactions, *Nanoscale* 13 (2021) 1331-1339.
- [2] M.J. Craig, G. Coulter, E. Dolan, J. Soriano-López, E. Mates-Torres, W. Schmitt, M. García-Melchor, Universal scaling relations for the rational design of molecular water oxidation catalysts with near-zero overpotential, *Nat. Commun.* 10 (2019) 1-9.
- [3] J. Li, W. Huang, M. Wang, S. Xi, J. Meng, K. Zhao, J. Jin, W. Xu, Z. Wang, X. Liu, Low-crystalline bimetallic metal-organic framework electrocatalysts with rich active sites for oxygen evolution, *ACS Energy Lett.* 4 (2018) 285-292.
- [4] Z. Xue, Y. Li, Y. Zhang, W. Geng, B. Jia, J. Tang, S. Bao, H.P. Wang, Y. Fan, Z.w. Wei, Modulating electronic structure of metal-organic framework for efficient electrocatalytic oxygen evolution, *Adv. Energy Mater.* 8 (2018) 1801564.
- [5] X.L. Wang, L.Z. Dong, M. Qiao, Y.J. Tang, J. Liu, Y. Li, S.L. Li, J.X. Su, Y.Q. Lan, Exploring the performance improvement of the oxygen evolution reaction in a stable bimetal-organic framework system, *Angew. Chem. Int. Ed.* 57 (2018) 9660-9664.
